# Supplementary material for: Intratumoral immune triads are required for adoptive T cell therapy-mediated elimination of solid tumors
Source: PubMed Central journal article supplement — bioRxiv. 2023 Jul 3:2023.07.03.547423. Preprint. [Version 1] doi: 10.1101/2023.07.03.547423 (PMC10349998; doi:10.1101/2023.07.03.547423), 2023-07-03
Supplement: NIHPP2023.07.03.547423V1-supplement-1.pdf [file NIHPP2023.07.03.547423V1-supplement-1.pdf]

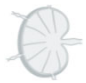

## Tumor-draining lymph node

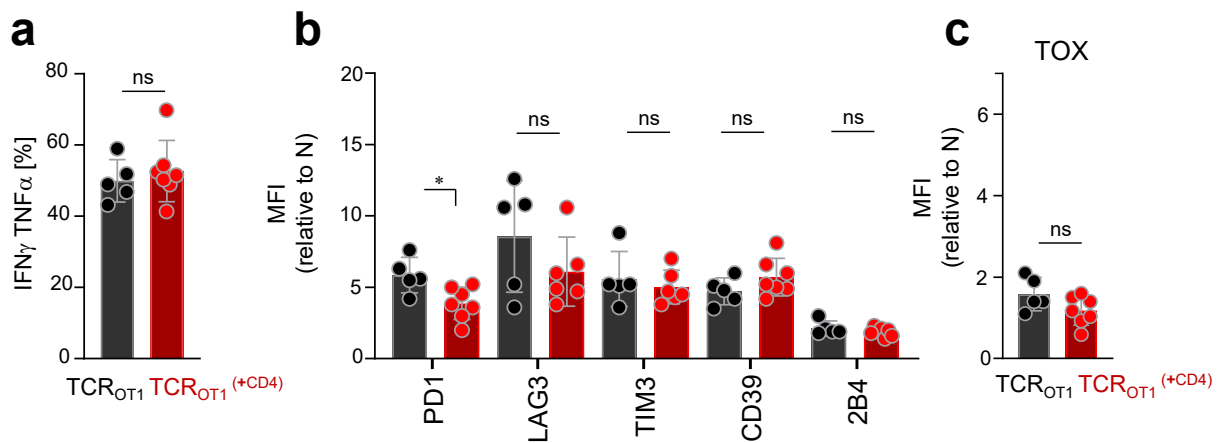

**Supplementary Figure 1:** **a.** IFN $\gamma$  and TNF $\alpha$  production, **b.** inhibitory receptor expression, and **c.** TOX expression of TCR<sub>OT1</sub> isolated from tumor-draining lymph nodes of B16-OG tumor-bearing mice 8-9 days post transfer +/- TCR<sub>SMARTA</sub>. Cytokine production was assessed after 4-hr peptide stimulation *ex vivo*. Data show 2 pooled independent experiments (n=5-7). Data are shown as mean  $\pm$  SEM. \* $p$ <0.05, using unpaired two-tailed Student's *t* test. ns, not significant.

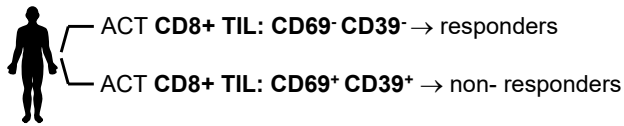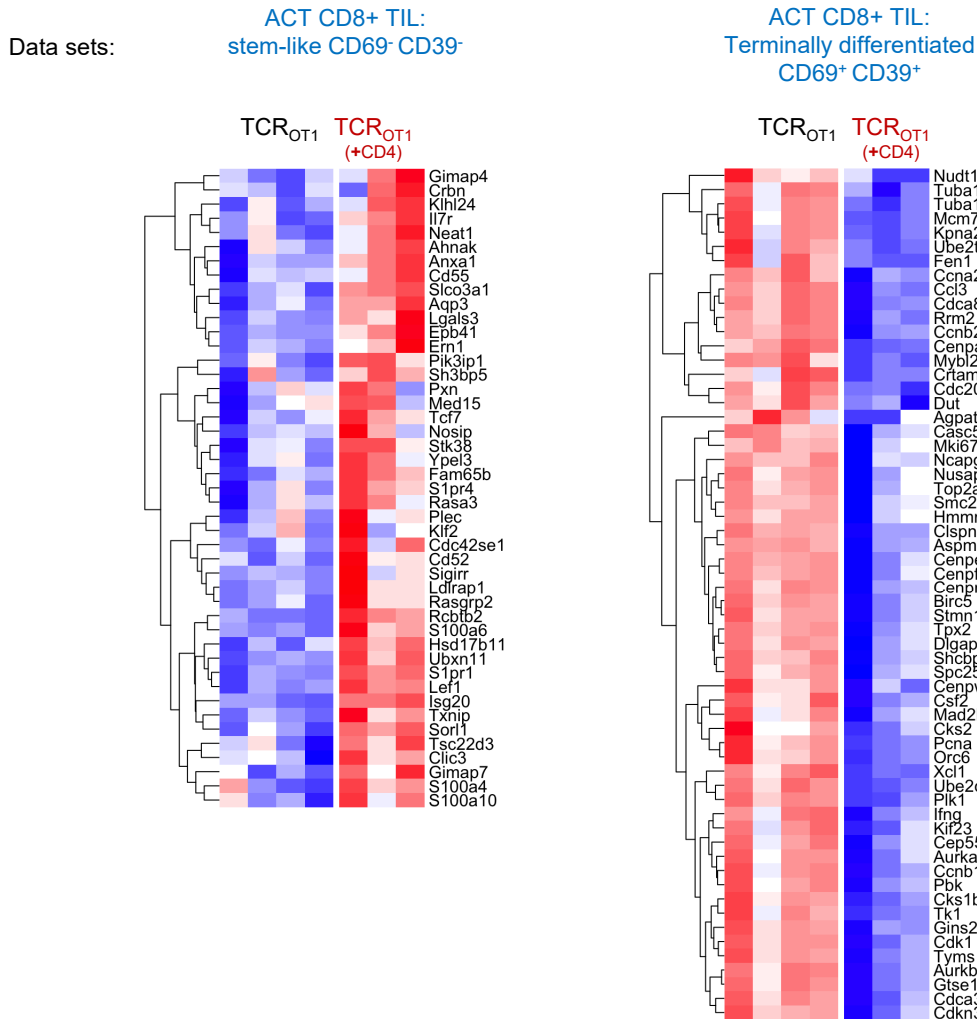

**Supplementary Figure 2:** Enrichment of gene sets in TCR<sub>OT1</sub> and TCR<sub>OT1</sub> (+CD4), respectively, described for human tumor infiltrating (TIL) CD8 T cells from metastatic melanoma patients receiving *ex vivo* expanded CD8+ TIL in in adoptive T cell transfers (ACT) (S. Krishna *et al*, *Science* 2020). ACT responders contained CD69<sup>-</sup> CD39<sup>-</sup> stem-like CD8+ TIL, which were lacking in ACT-non-responders. ACT non-responders contained CD69<sup>+</sup> CD39<sup>+</sup> terminally differentiated CD8+ TIL. TCR<sub>OT1</sub> (+CD4) are enriched in genes observed in CD69<sup>-</sup> CD39<sup>-</sup> stem-like T cells/TIL and are negatively enriched for genes from CD69<sup>+</sup> CD39<sup>+</sup> terminally differentiated CD8 T cells/TIL. Significantly differentially expressed, enriched genes are shown. See also main Figure 2g.

## Supplementary Figure 2

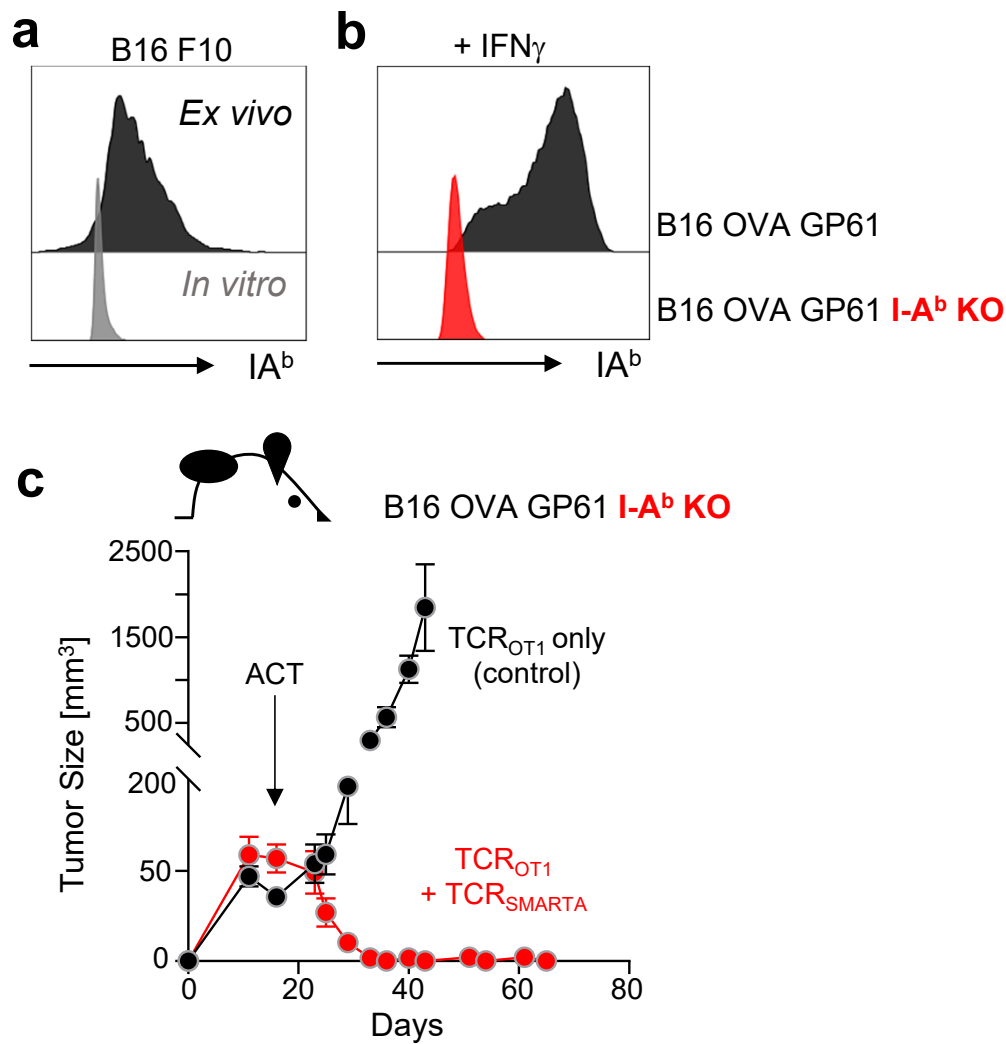

**Supplementary Figure 3: a.** Flow cytometric analysis of MHC class II I-A<sup>b</sup> expression on parental B16 tumor cells cultured *in vitro* (grey) or after isolation from tumor bearing B6 WT mice *ex vivo* (black). **b.** I-A<sup>b</sup> expression on B16-OG tumor cells (parental; black) or CRISPR/Cas9 gene-edited B16 OG I-A<sup>b</sup>-deficient cells (KO; red) after 48 hours IFN $\gamma$  treatment *in vitro*. **c.** Outgrowth of B16-OG I-A<sup>b</sup>-deficient tumors in B6 WT mice receiving adoptively transferred *in vitro* activated TCR<sub>OT1</sub> and TCR<sub>SMARTA</sub> (red) or TCR<sub>OT1</sub> only (black).
